# Supplementary material for: Estimates of Insulin Sensitivity Using Glucose and C-Peptide From the Hyperglycemia and Adverse Pregnancy Outcome Glucose Tolerance Test
Source: PubMed Central journal article supplement — Diabetes Care. 2009 Dec 23;33(3):490–4. doi: 10.2337/dc09-1463 (PMC2827494; doi:10.2337/dc09-1463), 2009-12-23
Supplement: supp_dc09-1463_dc09-1463_Online_Appendix.pdf [file supp_dc09-1463_dc09-1463_Online_Appendix.pdf]

## Online only Appendix 1

Correlation of  $IS_{\text{HOMA C-Pep}}$  and  $IS_{\text{Quicki C-Pep}}$  with  $IS_{\text{HOMA}}$ ,  $IS_{\text{Quicki}}$  and  $IS_{\text{OGTT}}$

$IS_{\text{HOMA C-Pep}}$  vs.  $IS_{\text{HOMA}}$   $r=0.735$

$IS_{\text{HOMA C-Pep}}$  vs.  $IS_{\text{Quicki}}$   $r= 0.771$

$IS_{\text{HOMA C-Pep}}$  vs.  $IS_{\text{OGTT}}$   $r= 0.676$

$IS_{\text{Quicki C-Pep}}$  vs.  $IS_{\text{HOMA}}$   $r=0.753$

$IS_{\text{Quicki C-Pep}}$  vs.  $IS_{\text{Quicki}}$   $r= 0.810$

$IS_{\text{Quicki C-Pep}}$  vs.  $IS_{\text{OGTT}}$   $r= 0.707$
